# Supplementary material for: Biocompatible composite hydrogel with on-demand swelling-shrinking properties for 4D bioprinting
Source: Royal Society of Chemistry journal article supplement (doi:10.1039/d5bm00551e), 2025-01-01
Supplement: d5bm00551e1.pdf [file d5bm00551e1.pdf]

## Biocompatible Composite Hydrogel with On-Demand Swelling-Shrinking Properties for 4D Bioprinting

Peter J. Jensen<sup>1</sup>, Josh P. Graham<sup>1</sup>, Trevor K. Busch<sup>1</sup>, Owen Fitz<sup>1</sup>, Sivani Jayanadh<sup>1,2</sup>, Thomas E. Pashuck<sup>1</sup>, Tomas Gonzalez-Fernandez<sup>1,3</sup>.

<sup>1</sup>Department of Bioengineering, Lehigh University, Bethlehem, PA, USA.

<sup>2</sup>Department of Biomedical Engineering, SRM Institute of Science and Technology, Kattankulathur, Tamil Nadu, India.

<sup>3</sup>Polymer Science and Engineering Program, Lehigh University, Bethlehem, Pennsylvania, USA.

### SUPPLEMENTARY INFORMATION

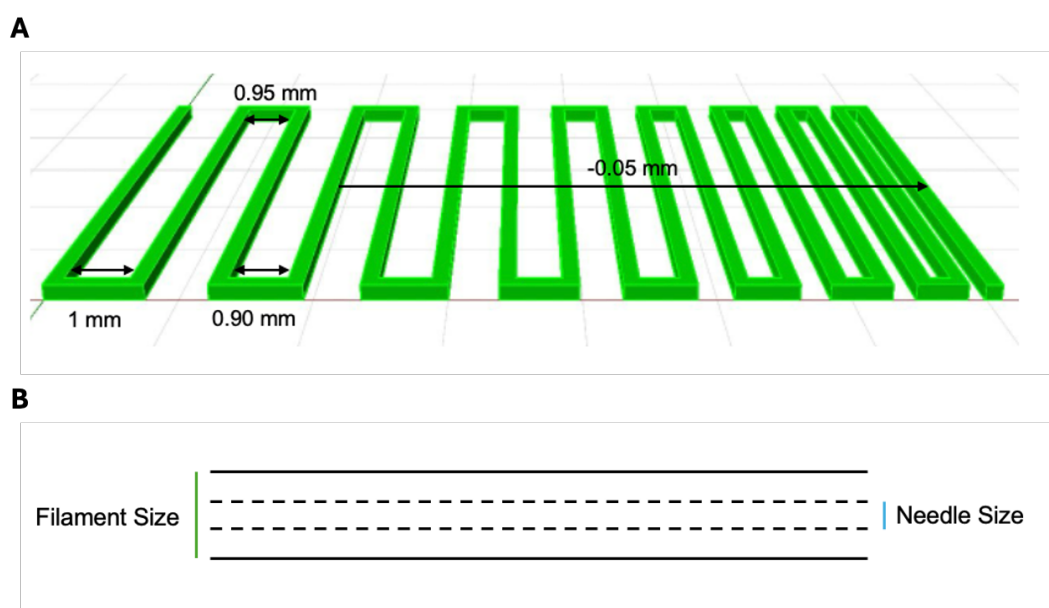

**Supplementary Fig. 1.** Schematic describing the filament fusion test. **(A)** The CAD file measurements and **(B)** an illustration of the needle diameter versus the actual spread of the filament.

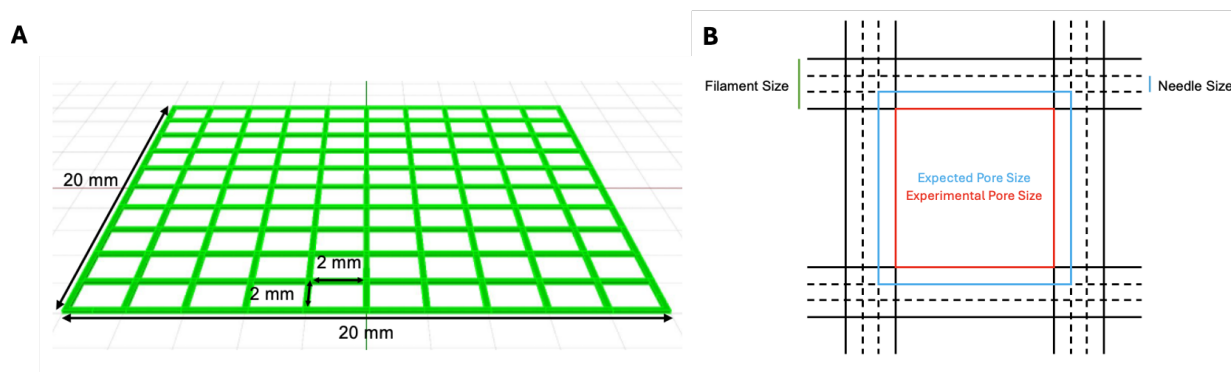

**Supplementary Fig. 2.** Schematic describing the porosity test. **(A)** The CAD file measurements and **(B)** an illustration of the expected pore size versus experimental pore size.

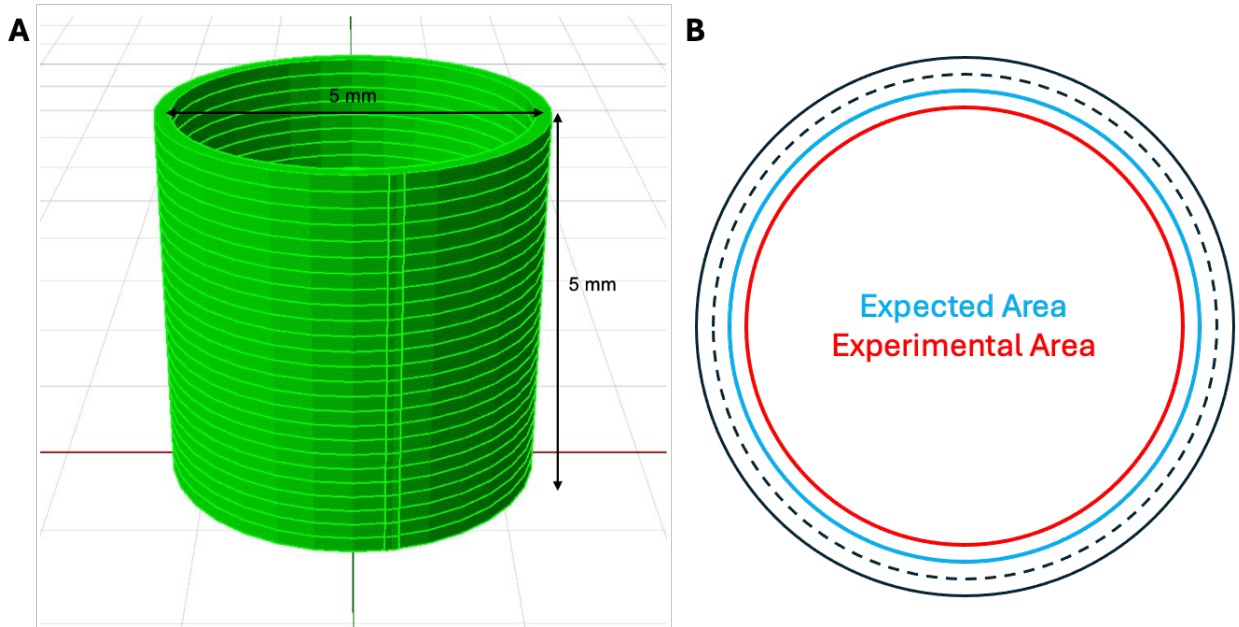

**Supplementary Fig. 3.** Schematic describing the cylinder test. **(A)** The CAD file measurements and **(B)** an illustration of the expected area versus experimental area.

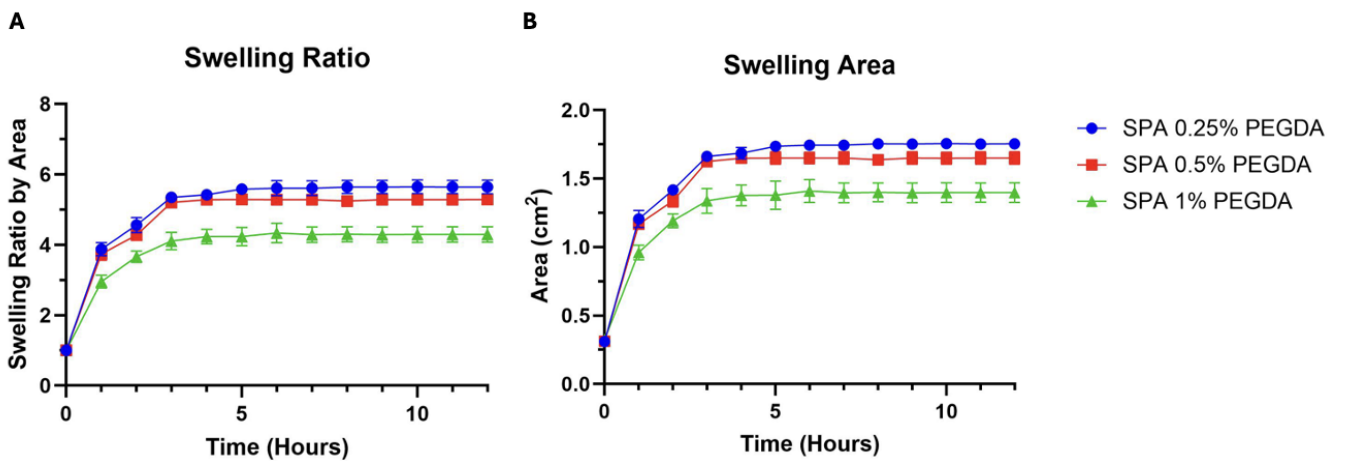

**Supplementary Fig. 4.** Characterization of SPA swelling area over 12 h. **(A)** Swelling ratio by area of SPA with change in PEGDA concentration swelled in DPBS for 12 hours and **(B)** area.

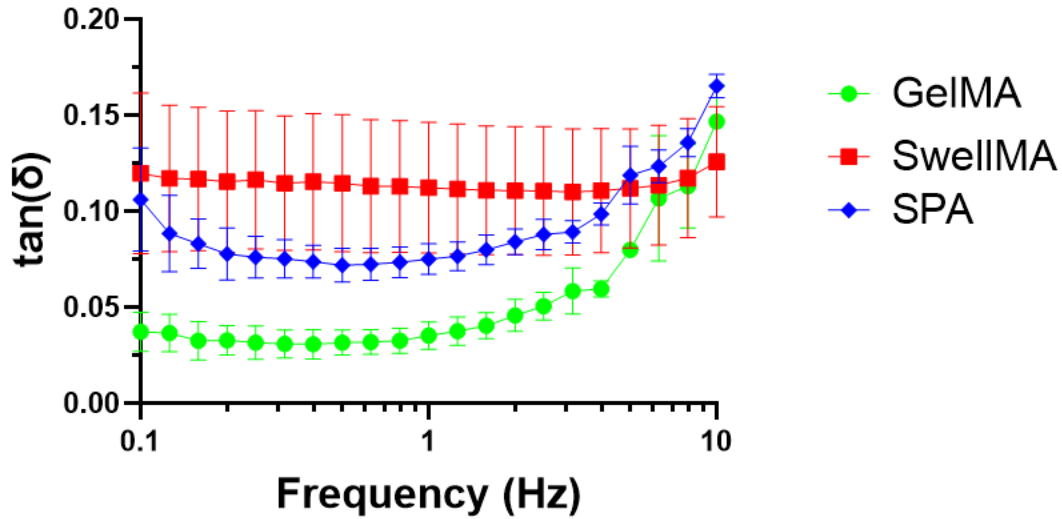

**Supplementary Fig. 5.** Tangent delta ( $\tan(\delta)$ ) of GelMA, SwellIMA, and SPA throughout the frequency sweep rheological assessment. At 1 Hz, SwellIMA exhibits the highest  $\tan(\delta)$  demonstrating its viscoelastic behavior. N = 3, data shown as mean  $\pm$  SD.

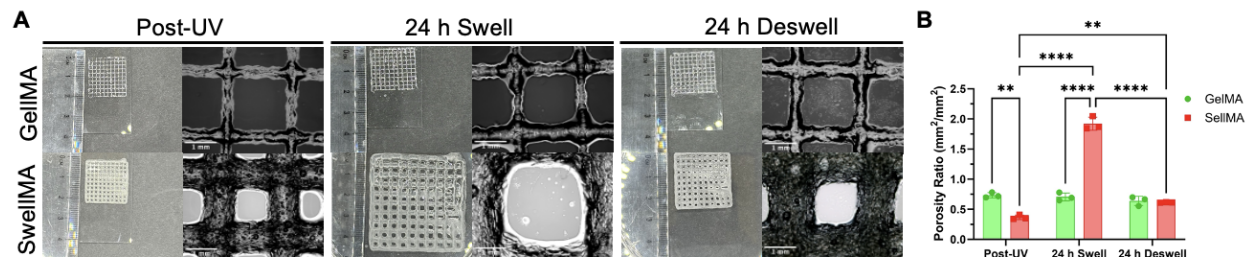

**Supplementary Fig. 6.** Porosity print test of SwellIMA and GelMA. **(A)** Macroscopic and microscopic images of the porosity print test for GelMA and SwellIMA with 24 h swell and 24 h deswell. **(B)** Quantification of the porosity ratio. \*\*\*\* Denotes significance ( $p < 0.0001$ ), \*\* ( $p < 0.01$ ), n = 3, data shown as mean  $\pm$  SD.

**Supplementary Video 1 (.mp4 file).**

**Supplementary Video 2 (.mp4 file).**

**Supplementary Video 3 (.mp4 file).**

**Supplementary Video 4 (.mp4 file).**
